# Supplementary material for: Promising Lipophilic PyTri Extractant for Selective Trivalent Actinide Separation from High Active Raffinate
Source: PubMed Central journal article supplement (PMC8972958; doi:10.1021/acs.iecr.2c00104), 2022-03-21
Supplement: ie2c00104_si_001.pdf [file ie2c00104_si_001.pdf]

# Supporting Information

## Promising lipophilic PyTri extractant for selective trivalent actinide separation from High Active Raffinate

*Annalisa Ossola<sup>1</sup>, Eros Mossini<sup>1</sup>, Elena Macerata<sup>1\*</sup>, Walter Panzeri<sup>2</sup>, Andrea Mele<sup>2,3</sup>, Mario Mariani<sup>1</sup>*

<sup>1</sup> Department of Energy, Politecnico di Milano, Piazza L. da Vinci 32, I-20133 Milano, Italy;

Tel: +39.02.23996385;

<sup>2</sup> C.N.R. – Consiglio Nazionale delle Ricerche, Istituto di Scienze e Tecnologie Chimiche

“G. Natta” (SCITEC), Sezione “U.O.S. Milano Politecnico”, Milan, Italy

<sup>3</sup> Department of Chemistry, Materials and Chemical Engineering “G. Natta”, Politecnico di

Milano, Piazza L. da Vinci, 32, 20133 Milano, Italy

\* Corresponding author:

Tel.: +39 02 2399 6358; fax: +39 02 2399 3863.

e-mail address: [elena.macerata@polimi.it](mailto:elena.macerata@polimi.it).

## Table of Contents

|                                                       |   |
|-------------------------------------------------------|---|
| 1. Selectivity towards Ln.....                        | 3 |
| 2. Resistance towards hydrolysis and radiolysis ..... | 3 |
| 2. By-products identification .....                   | 4 |

## 1. Selectivity towards Ln

Table S1 Separation factors of  $^{241}\text{Am}$  over trivalent  $^{152}\text{Eu}$ , Y and lighter Ln (La-Gd) as a function of the nitric acid concentration of the aqueous phase. Organic phase: 0.2 M PTEH in kerosene + 10 vol.% 1-octanol mixture. Aqueous phase:  $\text{HNO}_3$  solutions loaded with Y and lighter Ln (La-Gd), besides trivalent  $^{241}\text{Am}$  and  $^{152}\text{Eu}$  as radiotracers

|                   | SF( $\text{Am}^{3+}/\text{M}^{3+}$ ) |          |          |
|-------------------|--------------------------------------|----------|----------|
|                   | 1 M                                  | 2 M      | 3 M      |
| Y                 | 524 ± 74                             | 321 ± 45 | 213 ± 30 |
| La                | > 1000                               | 300 ± 42 | 128 ± 18 |
| Ce                | 724 ± 102                            | 330 ± 46 | 165 ± 23 |
| Pr                | 378 ± 53                             | 375 ± 53 | 237 ± 33 |
| Nd                | 239 ± 33                             | 378 ± 53 | 340 ± 48 |
| Sm                | 132 ± 18                             | 196 ± 27 | 210 ± 29 |
| Eu                | 99 ± 14                              | 110 ± 15 | 102 ± 14 |
| Gd                | 91 ± 12                              | 76 ± 10  | 66 ± 9   |
| $^{152}\text{Eu}$ | 82 ± 11                              | 86 ± 12  | 79 ± 11  |

## 2. Resistance towards hydrolysis and radiolysis

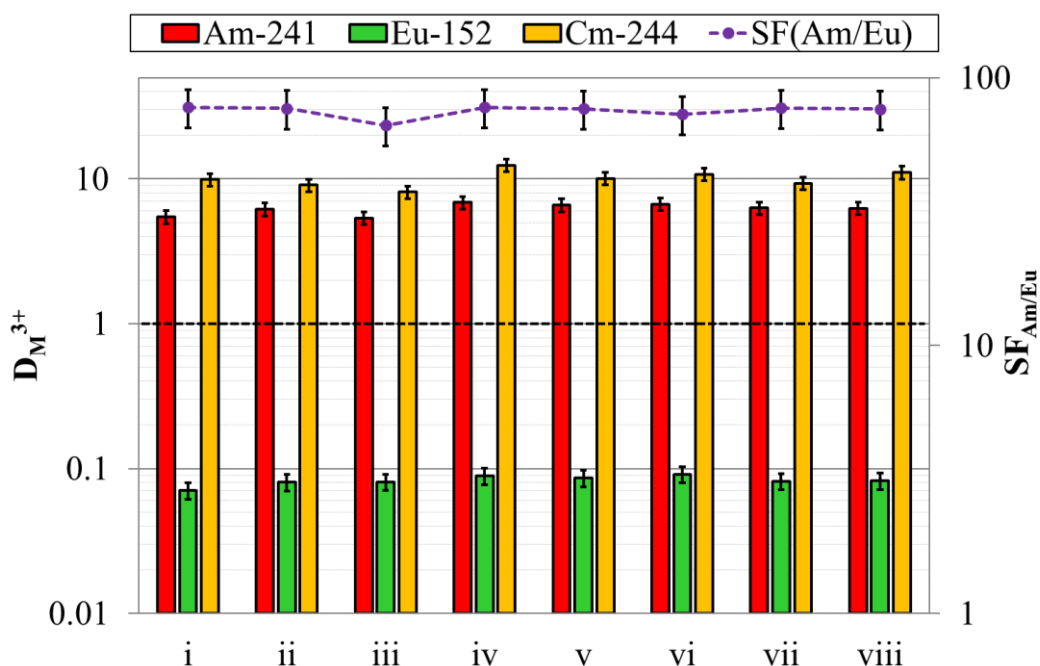

Figure S1 Distribution ratios and separation factors of trivalent  $^{241}\text{Am}$ ,  $^{244}\text{Cm}$  and  $^{152}\text{Eu}$  obtained by contacting 3 M  $\text{HNO}_3$  solutions spiked with trivalent  $^{241}\text{Am}$ ,  $^{244}\text{Cm}$  and  $^{152}\text{Eu}$  (ca. 10 kBq/mL each) with the following PTEH solutions: (i) fresh, (ii) aged for 71 days, (iii) aged for 169 days in contact with 3 M nitric acid, (iv) irradiated at

100 kGy, (v) irradiated at 200 kGy, (vi) irradiated at 300 kGy, (vii) irradiated at 100 kGy in contact with 3 M nitric acid and (viii) irradiated at 200 kGy in contact with 3 M nitric acid

## 2. By-products identification

The ESI-MS<sup>2</sup> spectrum of the protonated adduct of the by-product with molar mass 563.6 g·mol<sup>-1</sup> and identification attempts of some fragments are reported in Figure S2 and in Table S2, respectively. It was hypothesized to be the outcome of 1-octanal radical addition on the lateral chain. 1-octanal is supposed to be produced by secondary reaction of 1-octanol by-product. The ESI-tandem mass spectrometry attested that the proposed structure for by-product with molar mass 563.6 g·mol<sup>-1</sup> is reasonable.

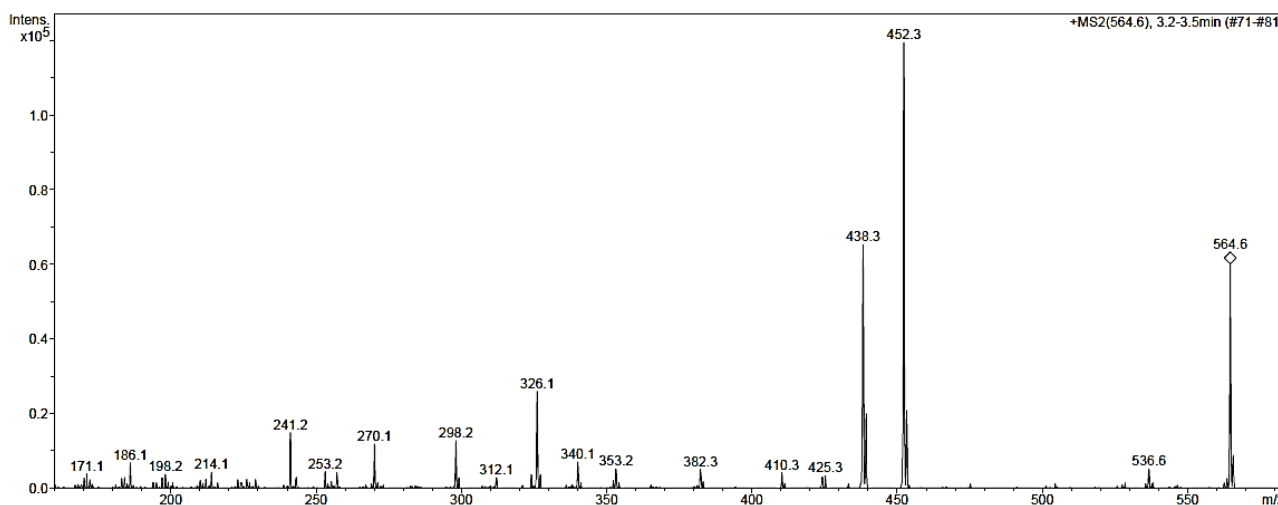

Figure S2 HPLC coupled with ESI-MS<sup>2</sup> spectrum of protonated adduct of PTEH by-product with molar mass 563.6 g·mol<sup>-1</sup>

Table S2 Attempt of identification of some fragments in the MS<sup>2</sup> spectrum of PTEH by-product with molar mass 563.6 g·mol<sup>-1</sup>

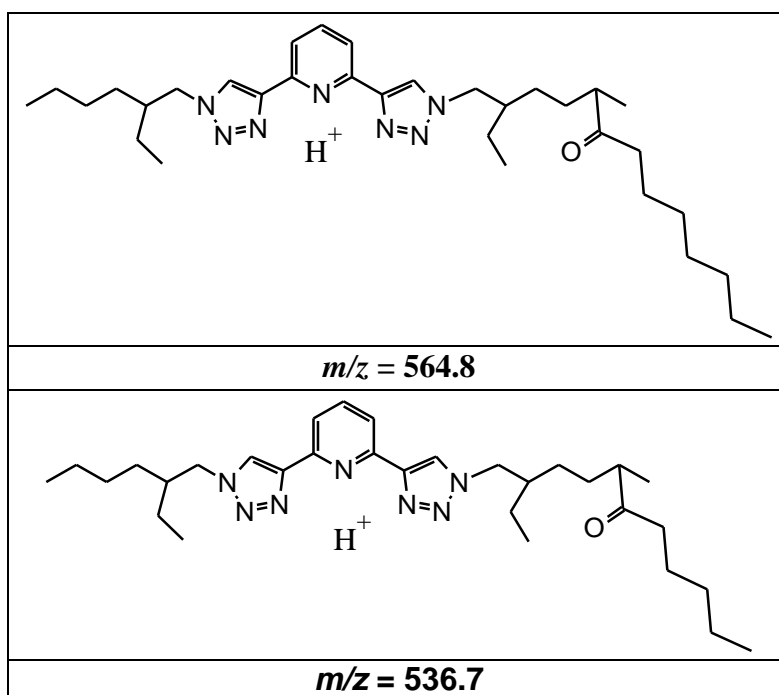

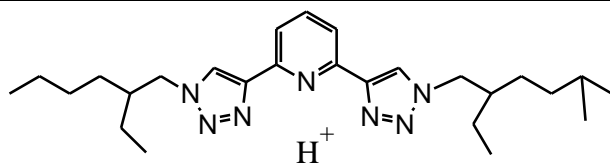

**$m/z = 452.6$**

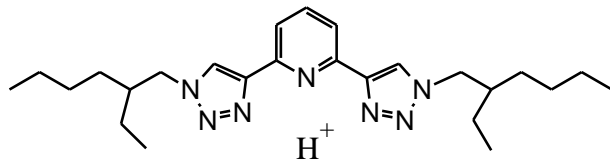

**$m/z = 438.6$**

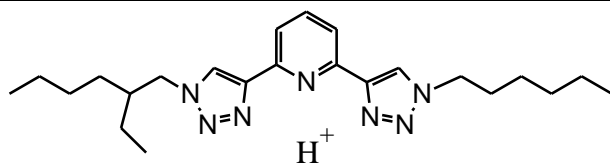

**$m/z = 410.6$**

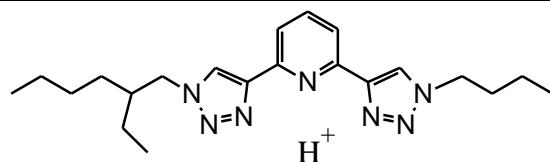

**$m/z = 382.5$**

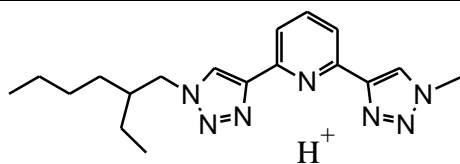

**$m/z = 340.4$**

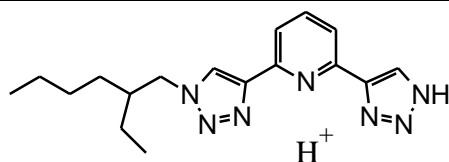

**$m/z = 326.4$**

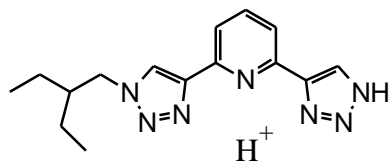

**$m/z = 298.4$**

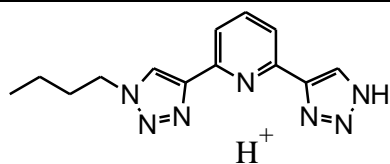

**$m/z = 270.3$**

The MS<sup>2</sup> spectrum of the protonated adduct of the by-product with molar mass 599.5 g·mol<sup>-1</sup> and identification attempts of some fragments are reported in Figure S3 and in Table S3, respectively. It was hypothesized that a kerosene carbon-centered radical is added on the lateral chain. As in the previous case, the ESI-tandem mass spectrometry attested that the proposed structure for by-product with molar mass 599.5 g·mol<sup>-1</sup> is reasonable.

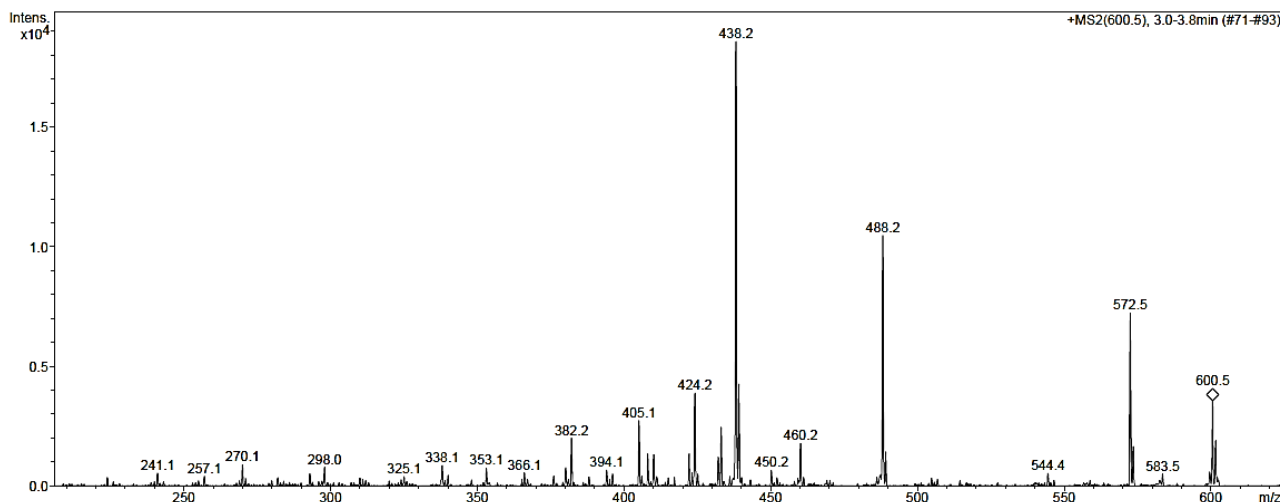

**Figure S3 HPLC coupled with ESI-MS<sup>2</sup> spectrum of protonated adduct of PTEH by-product with molar mass 599.5 g·mol<sup>-1</sup>**

**Table S3 Attempt of identification of some fragments in the MS<sup>2</sup> spectrum of PTEH by-product with molar mass 599.5 g·mol<sup>-1</sup>**

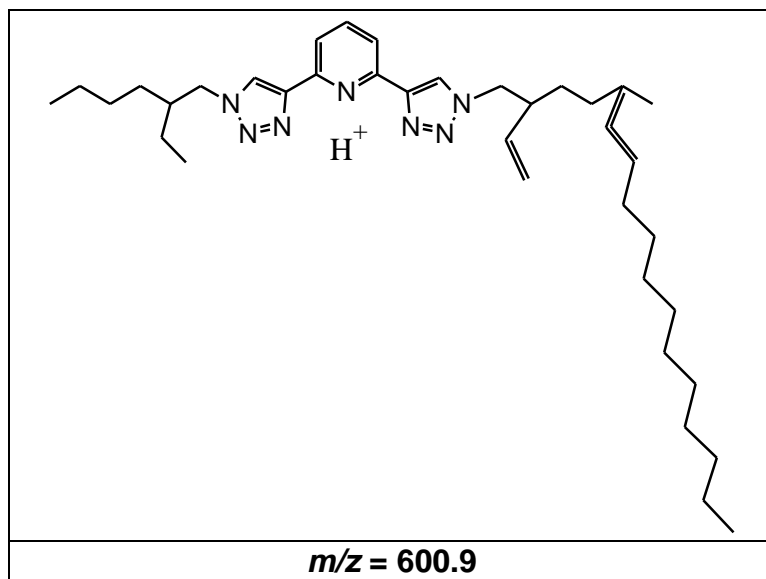

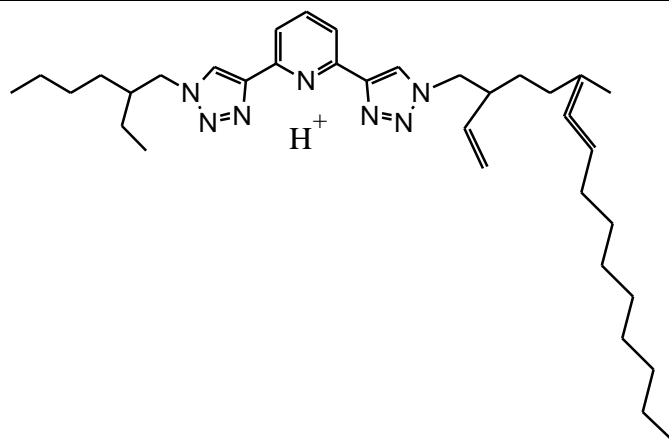

$m/z = 572.8$

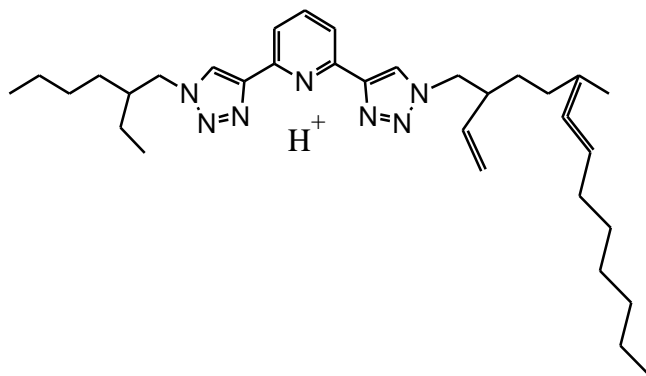

$m/z = 544.8$

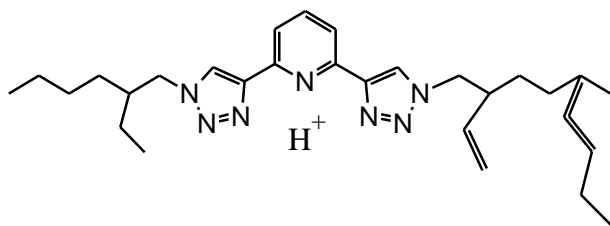

$m/z = 488.7$

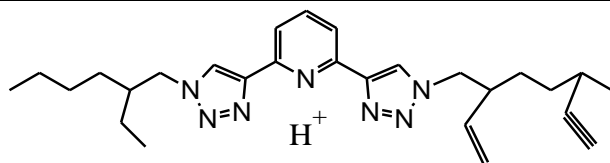

$m/z = 460.6$

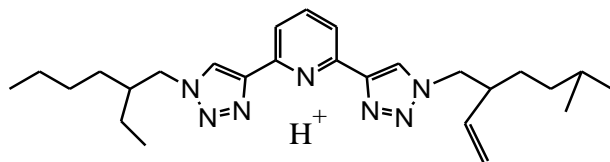

$m/z = 450.6$

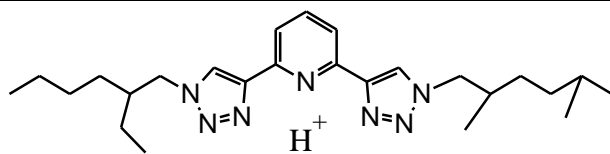

$m/z = 438.6$

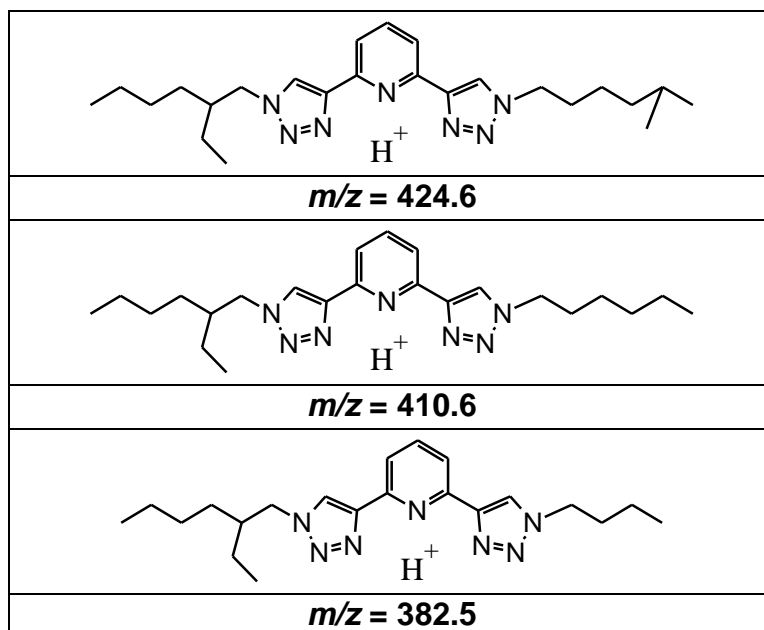

Finally, the MS<sup>2</sup> spectrum of the protonated adduct of the by-product with molar mass 580.5 g·mol<sup>-1</sup> and identification attempts of some fragments are reported in Figure S4 and in Table S4, respectively. In this case, the addition of C<sub>6</sub> and nitric acid radicals produced an adduct on the lateral chain. Once again, the ESI-tandem mass spectrometry proved that the proposed structure for by-product with molar mass 580.5 g·mol<sup>-1</sup> is realistic.

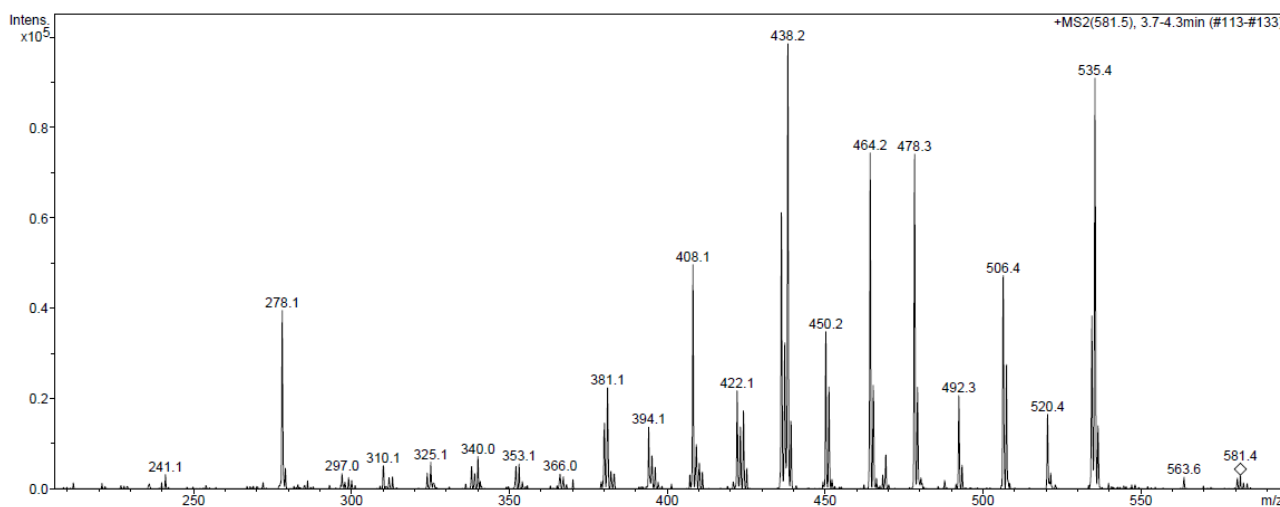

**Figure S4** HPLC coupled with ESI-MS<sup>2</sup> spectrum of protonated adduct of PTEH by-product with molar mass 580.5 g·mol<sup>-1</sup>

**Table S4** Attempt of identification of some fragments in the MS<sup>2</sup> spectrum of PTEH by-product with molar mass 580.5 g·mol<sup>-1</sup>



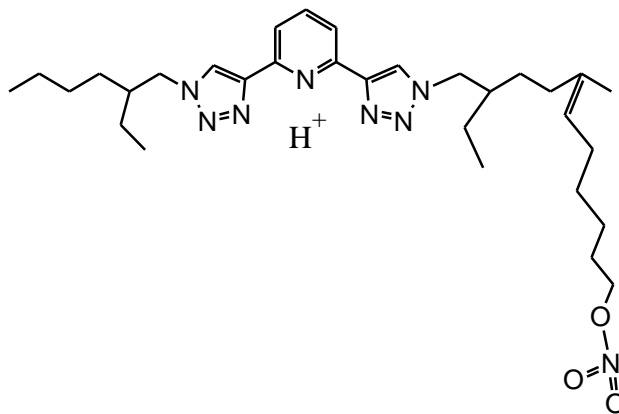

**$m/z = 581.7$**

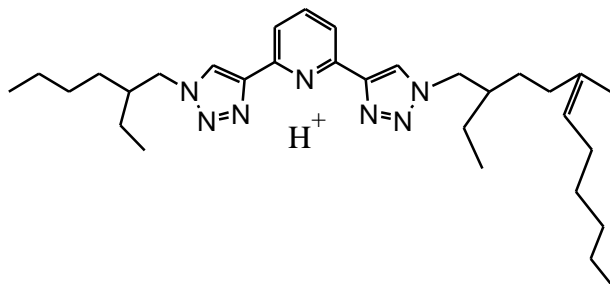

**$m/z = 520.7$**

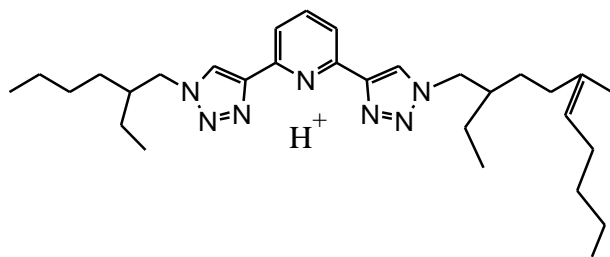

**$m/z = 506.4$**

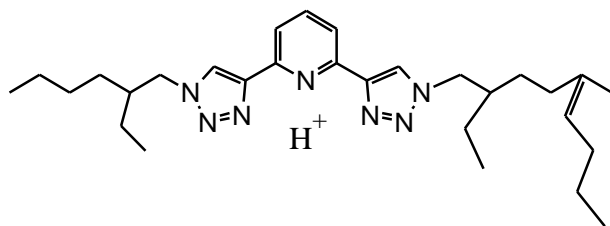

**$m/z = 492.7$**

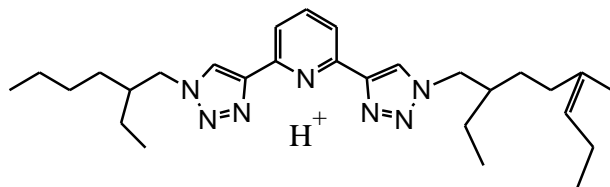

**$m/z = 478.7$**

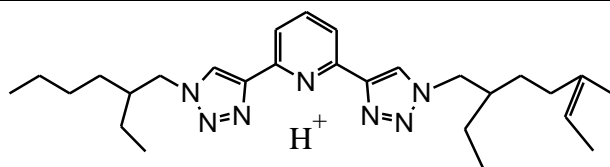

**$m/z = 464.2$**

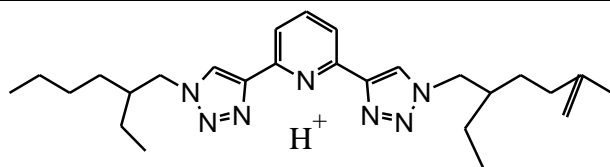

**$m/z = 450.6$**

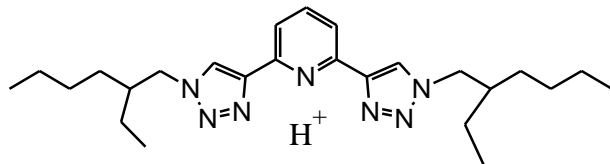

**$m/z = 438.6$**

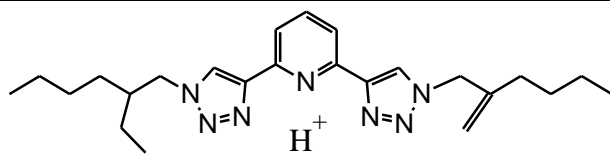

**$m/z = 422.6$**

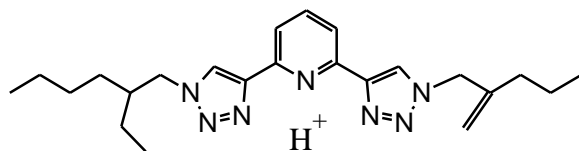

**$m/z = 408.6$**

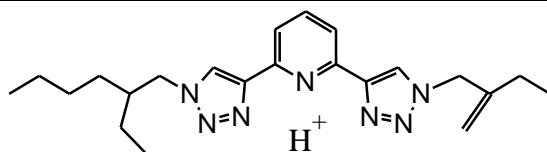

**$m/z = 394.5$**
